# Supplementary material for: Mechismo: predicting the mechanistic impact of mutations and modifications on molecular interactions
Source: PubMed Central journal article supplement (PMC4333368; doi:10.1093/nar/gku1094), 2014-11-11
Supplement: supp_gku1094_nar-02971-met-n-2014-File003.pdf [file supp_gku1094_nar-02971-met-n-2014-File003.pdf]

## **Supplement for:**

### **Mechismo: predicting the mechanistic impact of mutations and modifications on molecular interactions**

Matthew J. Betts (1,2) Qianhao Lu (1,2), YingYing Jiang (1,2), Armin Drusko (1,2), Oliver Wichmann (1,2), Matthias Utz (1,2), Ilse Valtierra (1,2), Matthias Schlesner (3), Natalie Jaeger (3), David T. Jones (3), Stefan Pfister (3), Peter Lichter (3), Roland Eils (2,3), Reiner Siebert (4), Peer Bork (6), Gordana Apic (1,5), Anne-Claude Gavin (6), Robert B. Russell (1,2)\*

1. Cell Networks, University of Heidelberg, Im Neuenheimer Feld 267, 69120 Heidelberg, Germany
2. Bioquant, University of Heidelberg, Im Neuenheimer Feld 267, 69120 Heidelberg, Germany
3. Deutsches Krebsforschungszentrum, Im Neuenheimer Feld 280, 69120 Heidelberg, Germany
4. Institut für Humangenetik, Universitätsklinikum Schleswig-Holstein, Christian-Albrechts-Universität zu Kiel, Arnold Heller Straße 3, 24105 Kiel, Germany
5. Cambridge Cell Networks Ltd, St John's Innovation Centre, Cowley Road, CB3 0WS, Cambridge, UK.
6. EMBL, Meyerhofstrasse 1, 69117 Heidelberg, Germany

\*Correspondence: robert.russell@bioquant.uni-heidelberg.de

Tel: +49 6221 54 513 62 FAX: +49 6221 54 514 86

| Class           | Total-chemicals | Total-instances | Most-common (het codes) |
|-----------------|-----------------|-----------------|-------------------------|
| Organic         | 14120           | 27544           | UNL BEN PHQ 5BU MTE     |
| Drug-like       | 478             | 2102            | ADN CHD PAR STU 017     |
| Inorganic       | 133             | 649             | BEF AF3 0QE CF0 C2O     |
| Organomettallic | 221             | 14837           | PLP FMN SF4 SAH FES     |
| Inorganic       | 80              | 140             | FCO FNE FC6 CUB FCI     |
| Sugar           | 128             | 9821            | NAG MAN BMA GAL BGC     |
| Zn+             | 1               | 8802            | ZN                      |
| Mg++            | 1               | 8308            | MG                      |
| Ca++            | 1               | 7184            | CA                      |
| Mn++            | 1               | 2005            | MN                      |
| Fe++            | 1               | 1079            | FE                      |
| Cu+(+)          | 1               | 912             | CU                      |
| Other-Metal     | 84              | 4277            | NI CD CO FE2 HG         |
| ATP-like        | 68              | 3758            | ADP ATP ANP AMP ACP     |
| GTP-like        | 55              | 1957            | GDP GTP GNP 8OG DGT     |
| UTP-like        | 28              | 729             | UDP UMP U5P UPG DUP     |
| CTP-like        | 24              | 507             | DOC DCP CTP C5P CDP     |
| TTP-like        | 23              | 421             | THP TTP TMP TYD 2DT     |
| NAD-like        | 6               | 1742            | NAP NAD ZID 2NF NFD     |
| FAD-like        | 6               | 1472            | FAD FDA FAE 6FA FAA     |
| Lys-like        | 41              | 1286            | KCX LLP MLY M3L ALY     |
| Trp-like        | 31              | 231             | TRP DTR 0AF TYM FTR     |
| Cys-like        | 26              | 1262            | CSO CME OCS CSW CSX     |
| Arg-like        | 26              | 251             | ARG DAR HAR HMR 2MR     |
| Tyr-like        | 20              | 221             | TYR DTY NIY OMY OMZ     |
| Phe-like        | 21              | 202             | DPN PHE PHI MEA 4BF     |
| Leu-like        | 18              | 317             | LEU NLE DLE MLE MLU     |
| Glu-like        | 16              | 880             | PCA GLU DGL CGU FGA     |
| Asp-like        | 15              | 223             | ASP IAS DAS ACB PHD     |
| Met-like        | 15              | 8049            | MSE SAM FME MET CXM     |
| Ala-like        | 13              | 507             | CSD DAL ALA BAL MAA     |
| Pro-like        | 13              | 273             | HYP DPR PRO HZP N7P     |
| His-like        | 11              | 172             | HIC HIS DHI NEP MHS     |
| Ile-like        | 11              | 46              | ILE DIL IIL ILX IML     |
| Asn-like        | 11              | 93              | MEN ASN DSG AHB DMH     |
| Gln-like        | 7               | 61              | GLN DGN MEQ GNC NLQ     |
| Thr-like        | 9               | 55              | THR DTH ALO 2TL THC     |
| Ser-like        | 9               | 184             | DSN SER SAC SET HSE     |
| Val-like        | 9               | 229             | MVA DVA VAL FVA DIV     |
| Gly-like        | 2               | 171             | GLY OGA                 |
| pTyr-like       | 2               | 576             | PTR TYS                 |
| pST-like        | 4               | 1061            | SEP TPO D11 4TP         |
| Heme-like       | 58              | 3814            | HEM HEC SRM HEA HAS     |
| CoA-like        | 46              | 609             | COA ACO CAA MYA MLC     |
| Steroid-like    | 55              | 157             | DHT EST TES R18 AND     |
| Fatty-acid      | 16              | 465             | PLM MYR DAO DKA STE     |
| Ion             | 15              | 282             | OH O GD MO NH3          |
| Plipid          | 37              | 225             | FPP PGV LHG GPP DMA     |
| Alkane          | 18              | 187             | OCT D12 HEX D10 HP6     |
| Lipid           | 17              | 596             | BOG LMT BNG DMU UMQ     |

**Table S1** List of chemical classes, with numbers of discrete chemicals and examples of the most common of each type.



| Species               | Total proteins | Prot-prot (%) | Prot-chem (%) | Prot-DNA/RNA (%) |
|-----------------------|----------------|---------------|---------------|------------------|
| <i>H.sapiens</i>      | 20213          | 10676 52.8    | 9334 46.2     | 2759 13.6        |
| <i>M.musculus</i>     | 16670          | 9457 56.7     | 8282 49.7     | 2550 15.3        |
| <i>D.melanogaster</i> | 3231           | 1704 52.7     | 1563 48.4     | 590 18.3         |
| <i>C.elegans</i>      | 3467           | 1590 45.9     | 1466 42.3     | 544 15.7         |
| <i>S.cerevisae</i>    | 6621           | 2408 36.4     | 2163 32.7     | 770 11.6         |
| <i>E.coli</i>         | 4433           | 2380 53.7     | 2032 45.8     | 401 9.0          |
| <i>B.subtilis</i>     | 4185           | 1837 43.9     | 1684 40.2     | 340 8.1          |
| <i>M.pneumonia</i>    | 687            | 286 41.6      | 240 34.9      | 131 19.1         |

**Table S2** Breakdown of residues from each organism matched to structures interacting with other proteins, chemicals or DNA/RNA. The second number in each column are the percentages of the total covered by each.

| Interactor | RhoA | Wt       | R5Q      | L69R      | D76V     |
|------------|------|----------|----------|-----------|----------|
| ARHGAP1    | Pred | (+)      |          | ---       |          |
|            | Obs  | Positive |          | Negative  |          |
| ARHGAP20   | Pred | (+)      |          | ++        |          |
|            | Obs  | Weak     |          | Negative* |          |
| ARHGDI1    | Pred | (+)      |          | ---       |          |
|            | Obs  | Positive |          | NEGATIVE  |          |
| ARHGEF12   | Pred | (+)      | +/-      | --        | ----     |
|            | Obs  | Positive | Positive | Negative  | Positive |
| ARHGEF25   | Pred | (+)      | ++       | ---       | -        |
|            | Obs  | Positive | Positive | Negative  | Moderate |
| MCF2L      | Pred | (+)      | +/-      | -         |          |
|            | Obs  | Positive | Positive | Negative  |          |
| DIAPH1     | Pred | (+)      |          | ---       |          |
|            | Obs  | Positive |          | NEGATIVE  |          |

**Table S3** Summary of Yeast two-hybrid results for RhoA and various mutants against a selection of known interaction partners. + or - symbols denote positive or negative and the number the strength relative to the observation for the wild-type. +/- denotes an ambiguous situation, and (+) denotes “predictions” for wild-type (wt) where all interactions have been observed previously. \* denotes a Negative reported when the wt interaction was only very weak.

| Dataset | Int | Original |     |       |      | Positions only |       |       |      | Proteins/positions |       |       |      | Surface positions only |       |       |      | Surface proteins/positions |       |        |   |
|---------|-----|----------|-----|-------|------|----------------|-------|-------|------|--------------------|-------|-------|------|------------------------|-------|-------|------|----------------------------|-------|--------|---|
|         |     | T        | C   | %     | P    | T              | C     | %     | P    | T                  | C     | %     | P    | T                      | C     | %     | P    | T                          | C     | %      | P |
| Med     | PP  | 675      | 63  | 9.33  | 680  | 60             | 8.82  | 0.072 | 678  | 56                 | 8.26  | 0.06  | 663  | 51                     | 7.69  | 0.044 | 667  | 56                         | 8.4   | 0.064  |   |
| Med     | Nu  | 675      | 22  | 3.26  | 680  | 16             | 2.35  | 0.08  | 678  | 20                 | 2.95  | 0.119 | 663  | 23                     | 3.47  | 0.118 | 667  | 13                         | 1.95  | 0.045  |   |
| Med     | Ch  | 675      | 64  | 9.48  | 680  | 53             | 7.79  | 0.042 | 678  | 37                 | 5.46  | 0.002 | 663  | 55                     | 8.3   | 0.057 | 667  | 46                         | 6.9   | 0.018  |   |
| PC      | PP  | 1753     | 164 | 9.36  | 1752 | 149            | 8.5   | 0.032 | 1725 | 161                | 9.33  | 0.046 | 1720 | 150                    | 8.72  | 0.038 | 1668 | 153                        | 9.17  | 0.046  |   |
| PC      | Nu  | 1753     | 50  | 2.85  | 1752 | 53             | 3.03  | 0.076 | 1725 | 44                 | 2.55  | 0.072 | 1720 | 47                     | 2.73  | 0.08  | 1668 | 33                         | 1.98  | 0.023  |   |
| PC      | Ch  | 1753     | 144 | 8.21  | 1752 | 115            | 6.56  | 0.032 | 1725 | 105                | 6.09  | 0.035 | 1720 | 117                    | 6.81  | 0.039 | 1668 | 112                        | 6.81  | 0.037  |   |
| EcoPhos | PP  | 141      | 19  | 13.48 | 139  | 17             | 12.23 | 0.136 | 137  | 15                 | 10.95 | 0.12  | 133  | 20                     | 15.04 | 0.129 | 135  | 16                         | 11.85 | 0.133  |   |
| EcoPhos | Nu  | 141      | 10  | 7.09  | 139  | 7              | 5.04  | 0.156 | 137  | 7                  | 5.11  | 0.16  | 133  | 6                      | 4.51  | 0.14  | 135  | 10                         | 7.41  | 0.184  |   |
| EcoPhos | Ch  | 141      | 35  | 24.82 | 139  | 14             | 10.07 | 0.001 | 137  | 15                 | 10.95 | 0.001 | 133  | 22                     | 16.54 | 0.029 | 135  | 13                         | 9.63  | <0.001 |   |

**Table S4** Enrichment and significance (Fischer test) calculations for the datasets discussed in the manuscript (Med = Medulloblastoma; PC = Pancreatic cancer; EcoPhos = E.coli phosphosites) in protein-protein (PP) protein-chemical (Ch) and protein-DNA/RNA (Nu) interfaces. T is the total sites in each set, C is the count at the particular interface, % is the percentage and P is the p-value for the difference between shuffles. Shuffled datasets are those in the columns labeled positions/proteins/surface. Percentages are colored yellow if significance is <0.05, orange if <0.01, and grey if the value is higher than lower (all other values are lower indicating enrichment whether significant or not).

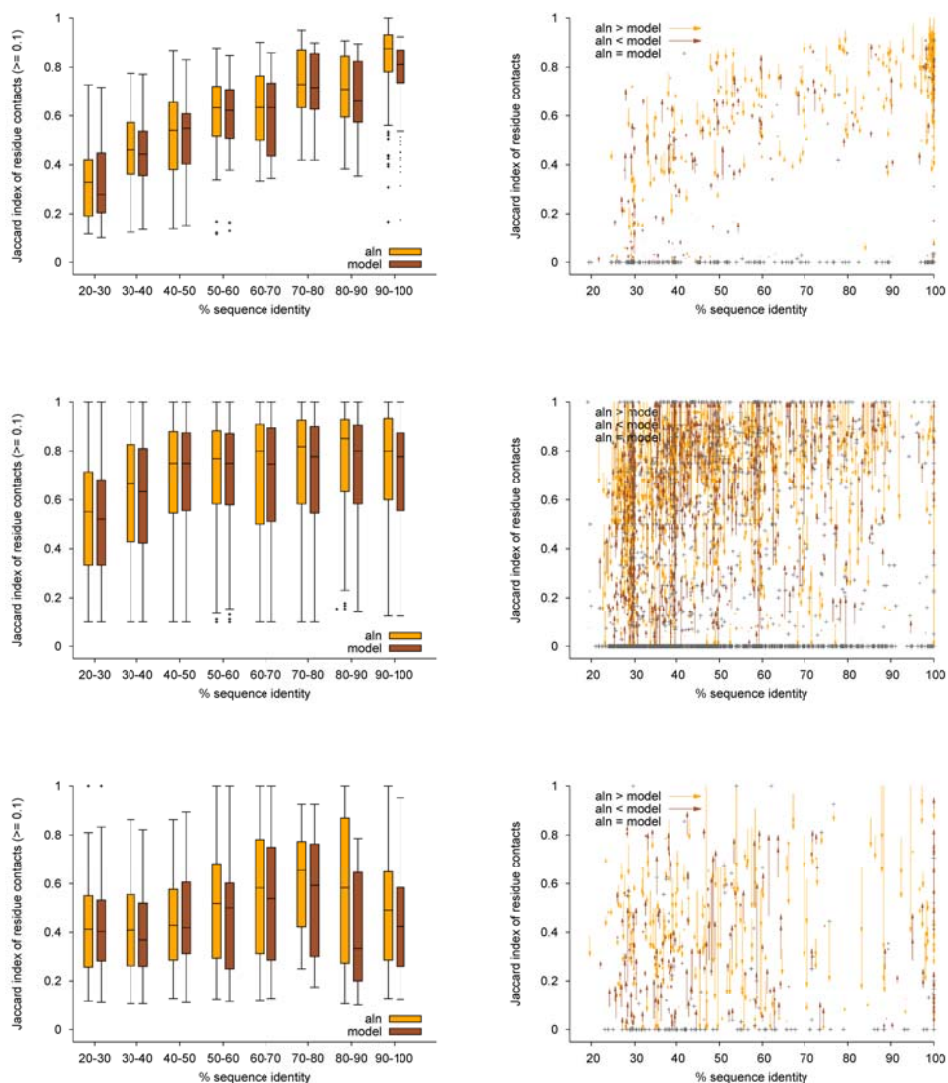

**Figure S1** Box plots (Tukey; left) and difference plots showing the Jaccard fraction of contacts preserved when comparing an interface of known 3D structure to either a template/alignment (aln) or a constructed homology model (model) and a range of sequence identities between target and 3D structure, for protein-protein (top), protein-chemical (middle) and protein-nucleic acid (bottom) interfaces. The figures to the right show the difference (as vectors) between aln and model coloured and oriented according to which strategy is better for each data point.

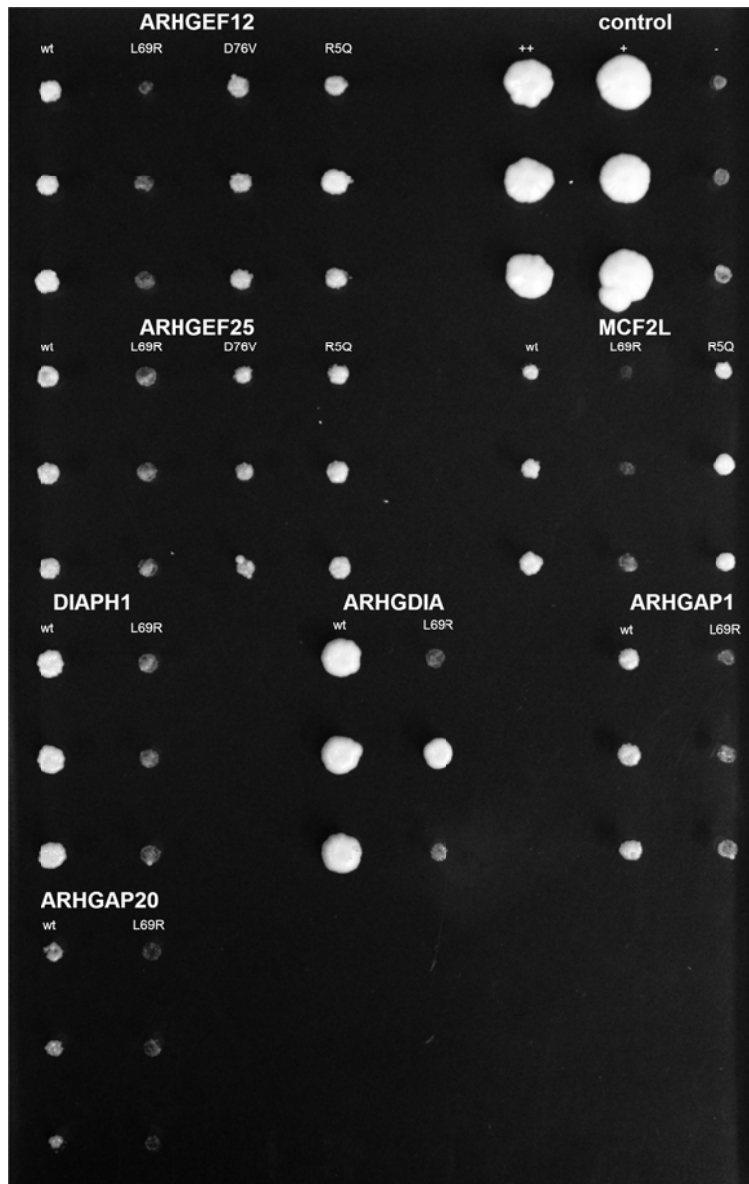

**Figure S2** Yeast two-hybrid results for testing RhoA wild-type (wt) and mutants against a selection of known RhoA interactions (see Figure 3 and Table S3). For this image 3 individual colonies of each co-transformations were picked and suspended in 100  $\mu$ l autoclaved saline. 10  $\mu$ l of this suspension was transferred into 100  $\mu$ l of selective growth medium (SC -Leu-Trp) and incubated at 30°C overnight. After that time cells were resuspended by vigorous shaking and spotted on assay plates (SC -Leu-Trp-His +10 mM 3AT). Phenotypes were assessed after 5 days.



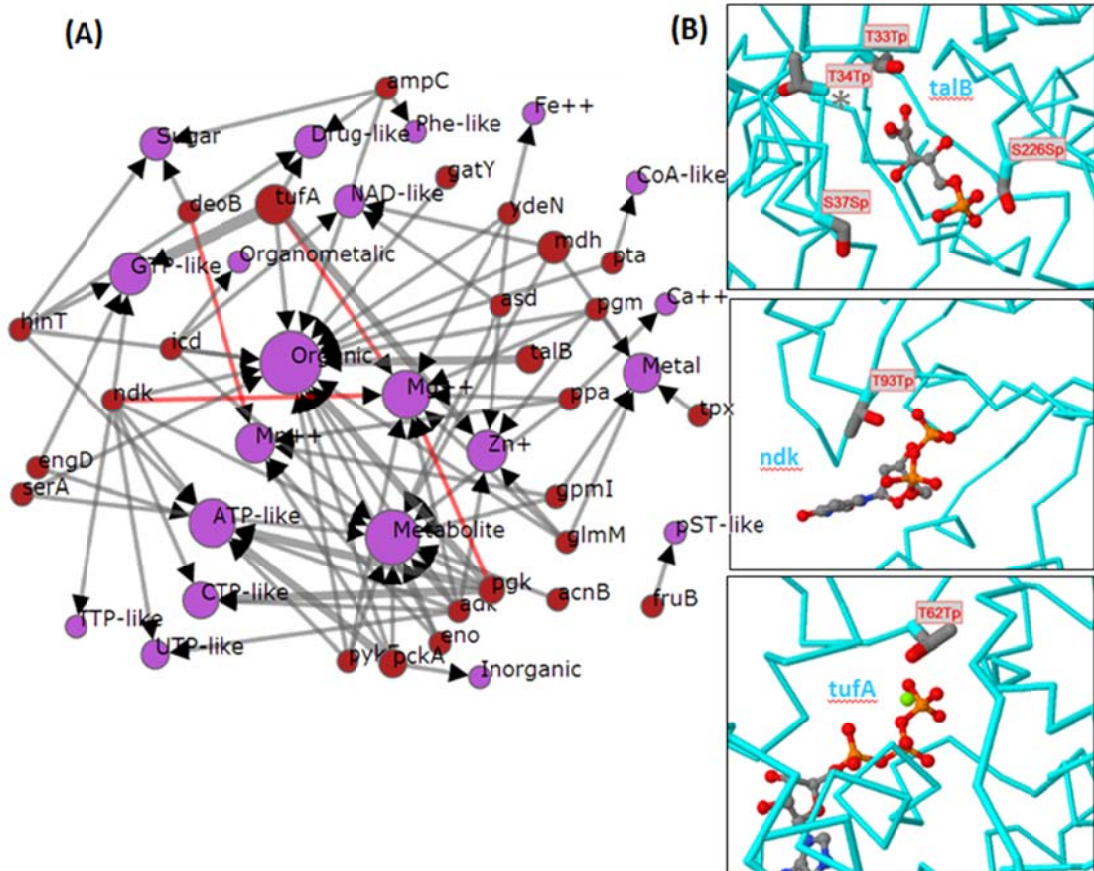

**Figure S3** Studying the phosphoproteome of *E. coli*

**A** Networks of phosphoproteins in *E. coli* (45) interacting with small molecules. Structures in **B** show examples of sites in contact with phosphate groups. Other details are as for Figure 3. Note that the topmost sites in talB are likely one ambiguous site from the same peptide (\*).

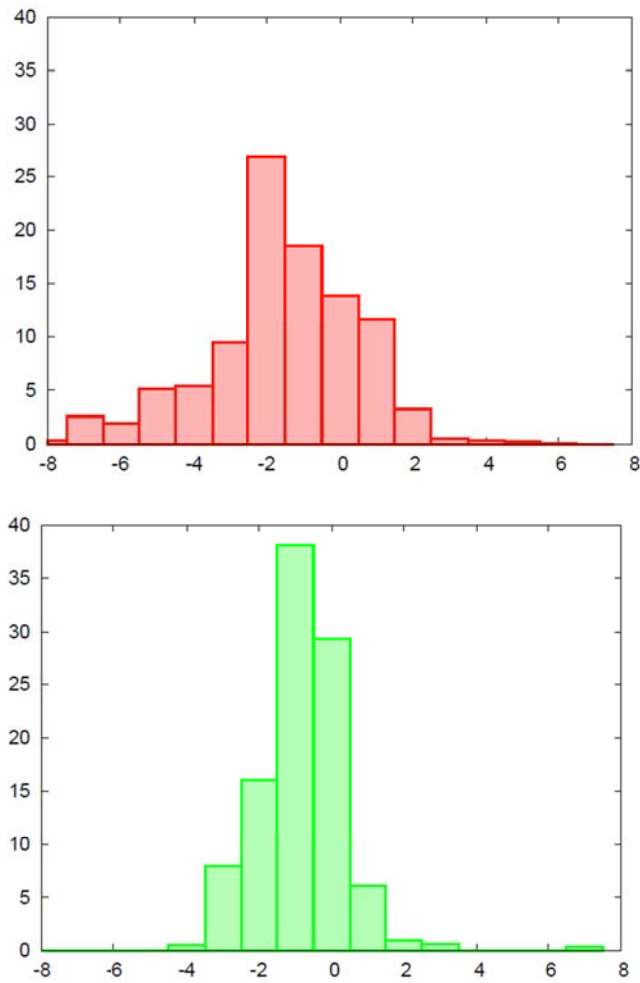

**Figure S4** Distribution of protein-protein interaction interaction effect scores for 14,837 deleterious (top) and 16,068 neutral (bottom) mutations (Bendl et al, *PLoS Comput. Biol.*, **10**, e1003440, 2014).

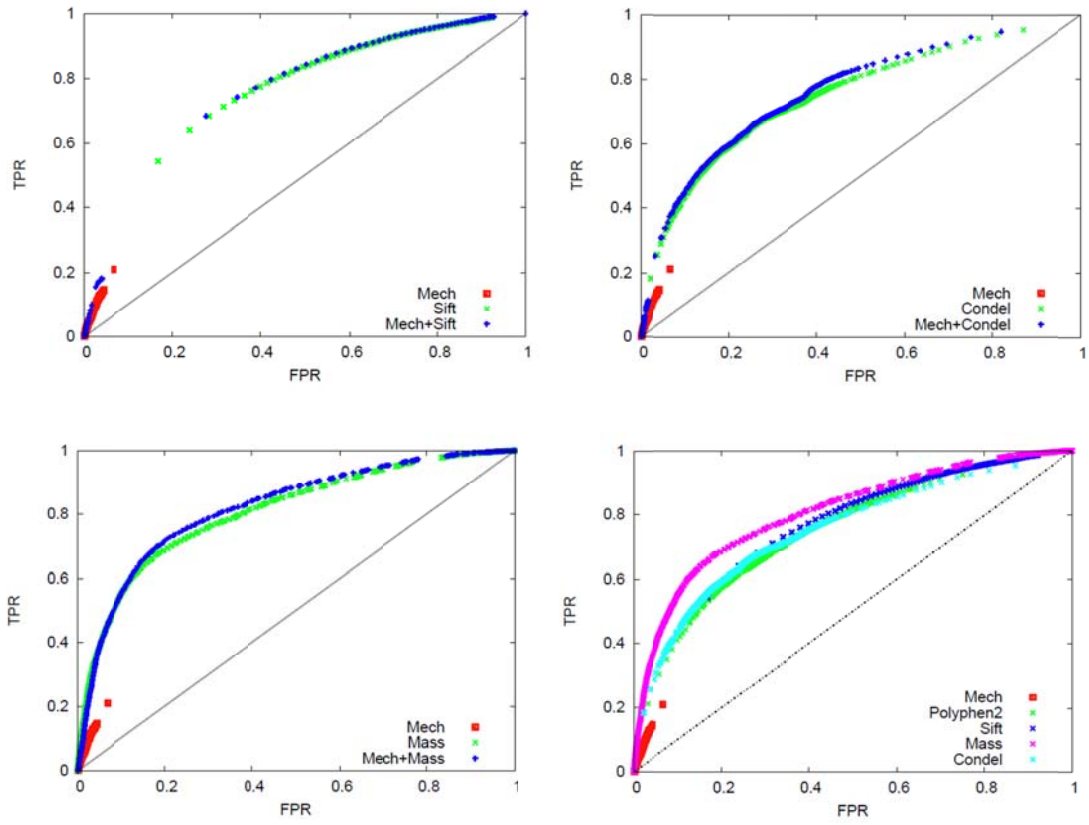

**Figure S5** ROC curves assessing mechismo as a predictor of deleterious mutations. All plots are true positive rate (TPR) versus false positive rate (FPR).

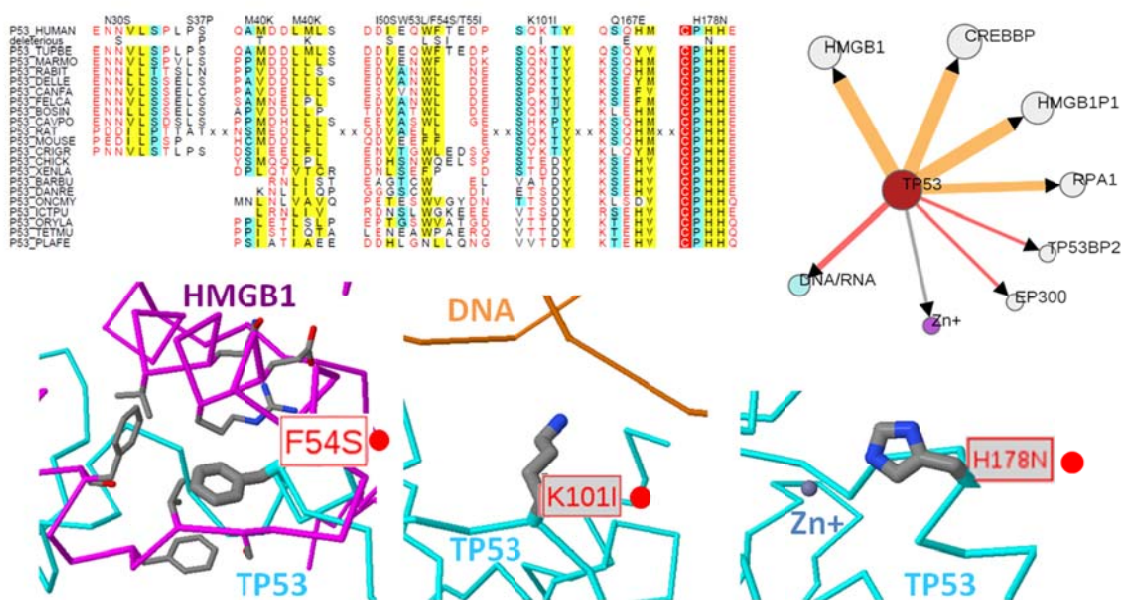

**Figure S6** Deleterious sites found only by Mechismo. Selection of deleterious mutations in TP53 that are not predicted by any of the three predictors but which have clear functional consequences. The top left shows an Alscript (61) coloured alignment (62) of sequences within the regions around the mutations (labelled) with residues coloured according to residue properties if shared across more than 50% of the sequences in the alignment: hydrophobic, yellow background; polar, red colour, small, blue background; total conservation, boxed red. The network right of the alignment shows interacting molecules likely affected by these mutations, with red lines indicating predicted disabling and orange a mixture of disabling/enabling (i.e. multiple mutations affect the interaction differently). The structural diagrams below show the location of the mutations within the appropriate structures. TP53 is shown in cyan C-alpha trace, interaction partner HMGB1 in magenta, DNA in gold. Mutated residues are labelled in red, interacting residues in black. All are shown as ball-and-stick format colored by atom type (carbon grey, nitrogen blue, oxygen red).
